# Supplementary material for: Biomimetic synthesis of aluminophosphate nanorolls induced by mixed organoamines
Source: Royal Society of Chemistry journal article supplement (doi:10.1039/b900635d), 2009-01-01
Supplement: b900635d.pdf [file b900635d.pdf]

**Supplementary Information**  
**Biomimetic synthesis of aluminophosphate nanorolls induced by mixed organoamines**

Xiangke Guo, Qianli Ma, Xuefeng Guo\*, Weiping Ding\* and Yi Chen

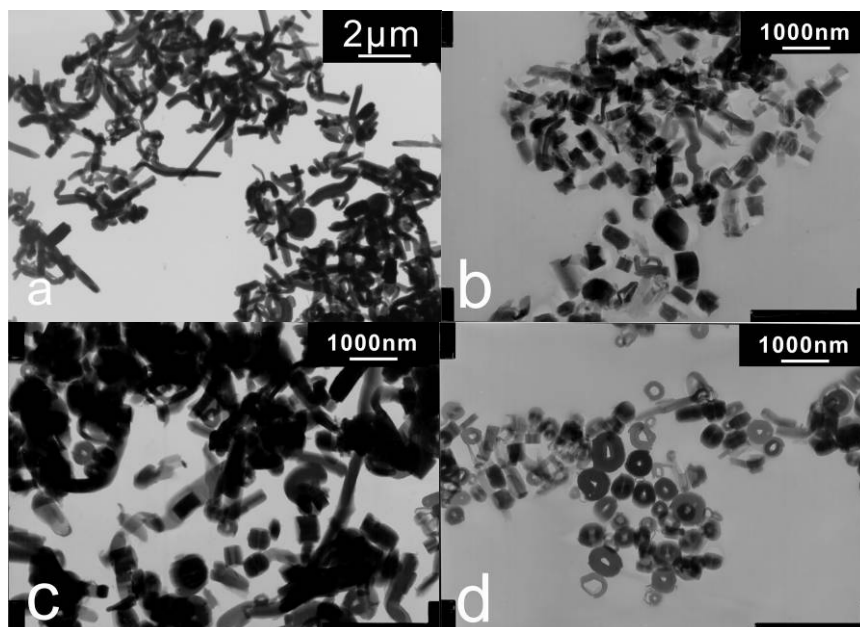

**Fig. S1** TEM images of the resultant samples hydrothermally treated at 383 K for 6 days with the precursors obtained under various adding rates of mixed organoamines ( $\sim 10.8/1.0$  of  $C_{12}H_{25}NH_2/C_{16}H_{33}NH_2$ ): (a) immediately; (b) 4 ml/min; (c) 1 ml/min; and (d) 0.1 ml/min.

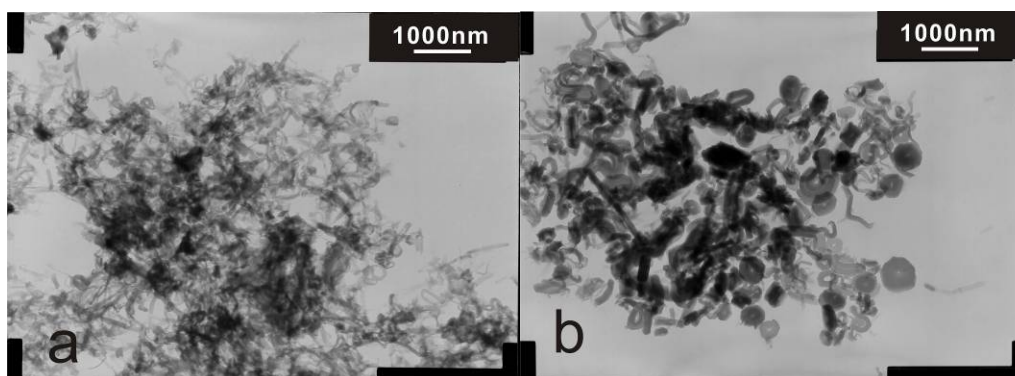

**Fig. S2** TEM images of the samples hydrothermally treated at 383 K for 6 days with the precursors using mixed organoamines in different molar ratios of  $C_{12}H_{25}NH_2/C_{16}H_{33}NH_2$ : (a) 12/1 and (b) 10/1.

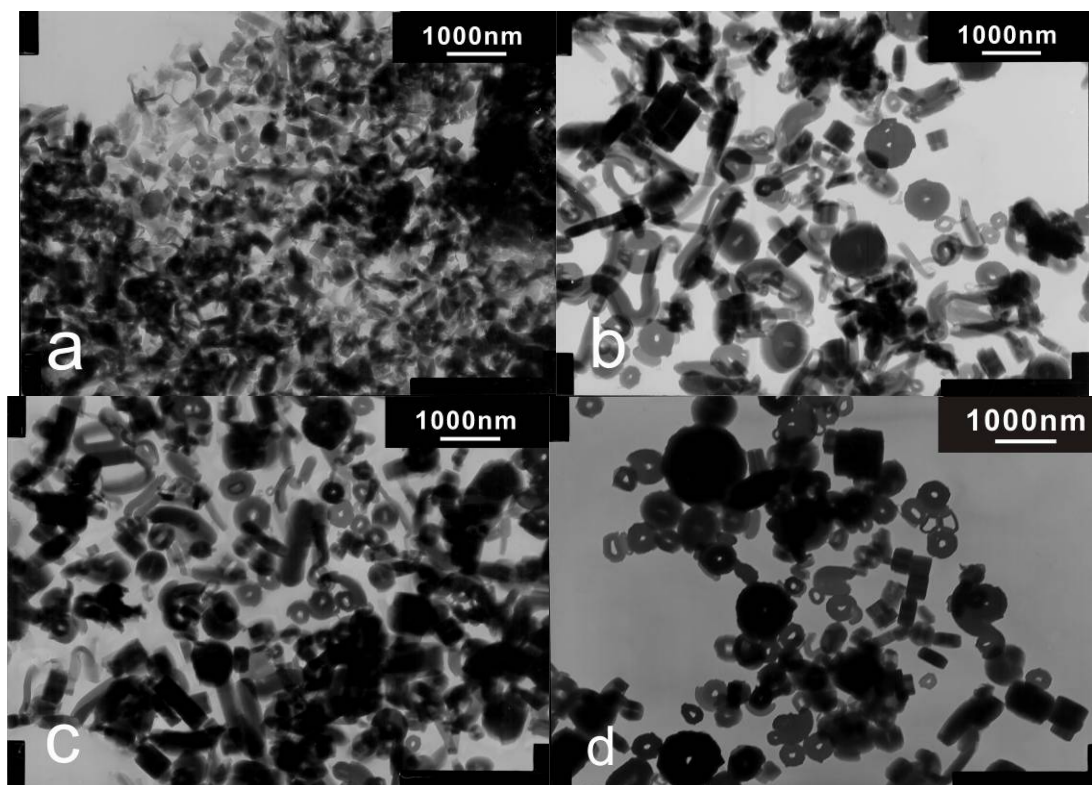

**Fig. S3** TEM images of the samples hydrothermally treated at 383 K for 6 days using mixed organoamines (~10.8/1.0 of  $C_{12}H_{25}NH_2/C_{16}H_{33}NH_2$ ) with the precursors obtained at: (a) 353 K; (b) 343 K; (c) 333 K and (d) 323 K.

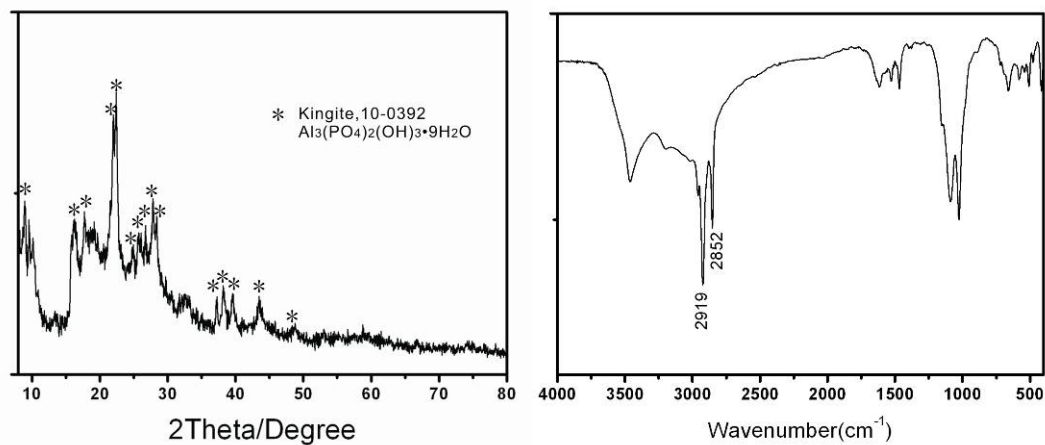

**Fig. S4** The left shows the XRD pattern of the precursor obtained after the mixed organoamine (~10.8/1.0 of  $C_{12}H_{25}NH_2/C_{16}H_{33}NH_2$ ) adding at 323 K but before hydrothermal treatment. The right shows the IR spectra of the sample after hydrothermal treatment of 6 days. The strong signals at 2850 and 2920  $cm^{-1}$  correspond to the  $CH_2$  groups of organoamines.

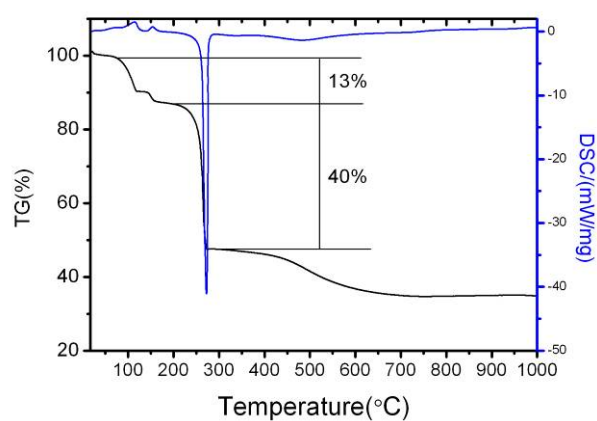

**Fig. S5** TG/DSC curves of the nanorolls synthesized at 383 K for 6 days with mixed organoamines (~10.8/1.0 of  $C_{12}H_{25}NH_2/C_{16}H_{33}NH_2$ ).

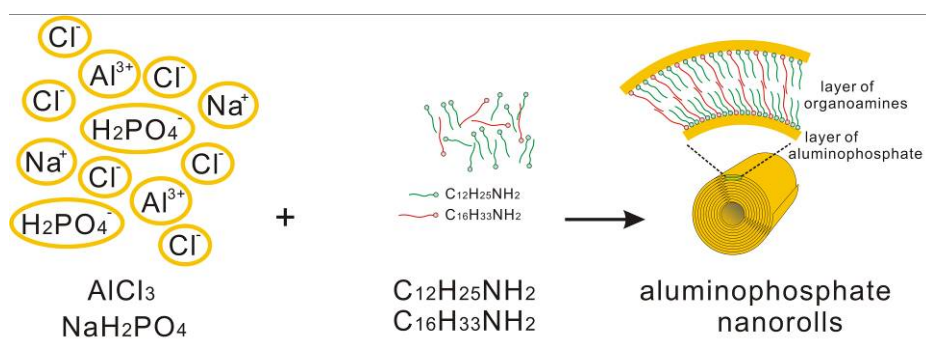

**Fig. S6** The chemical structure of organoamines / reaction scheme.
